# Supplementary material for: New insights into urethane alcoholysis enable chemical full recycling of blended fabric waste
Source: Royal Society of Chemistry journal article supplement (doi:10.1039/d2gc03663k), 2022-11-25
Supplement: d2gc03663k1.pdf [file d2gc03663k1.pdf]

## Supplementary Information

### New insights into urethane alcoholysis enable chemical full recycling of blended fabric wastes

Wen-Hao Xu, Lin Chen\*, Shun Zhang, Rong-Cheng Du, Xuehui Liu, Shimei Xu, Yu-Zhong Wang\*

*Collaborative Innovation Center for Eco-Friendly and Fire-Safety Polymeric Materials (MoE), State Key Laboratory of Polymer Materials Engineering, National Engineering Laboratory of Eco-Friendly Polymeric Materials (Sichuan), College of Chemistry, Sichuan University, Chengdu 610064, China*

\*Corresponding authors: linchen410@scu.edu.cn; yzwang@scu.edu.cn

**Table S1.** GPC data for unreacted spandex and formed sticky solid after glycolysis

| Sample       | $M_n (\times 10^4 g/mol)$ | $M_w (\times 10^4 g/mol)$ | $M_w/M_n$ |
|--------------|---------------------------|---------------------------|-----------|
| Spandex      | 3.66                      | 7.86                      | 2.15      |
| Sticky solid | 0.30                      | 0.74                      | 2.47      |

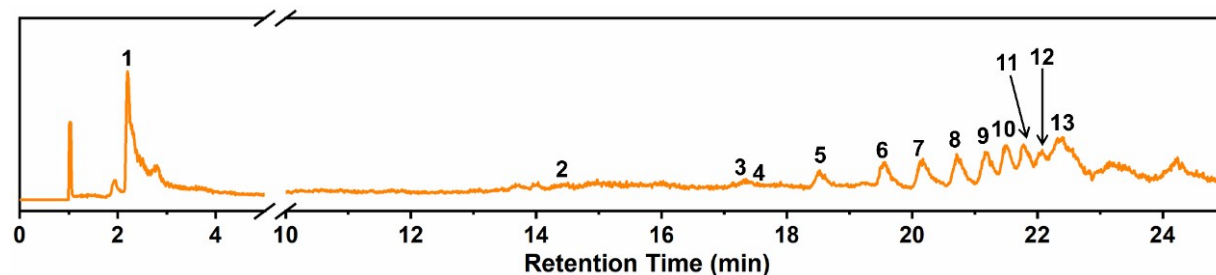

**Fig. S1.** High performance liquid chromatography mass spectrometer (LC-MS) chromatogram of the formed glycolysis solution for pure spandex after glycolysis process.

Detailed test conditions: separation was carried out on a Hypersil Gold column (150 mm  $\times$  2.1 mm, 5  $\mu$ m, Thermo), column temperature = 30  $^{\circ}$ C, detector temperature = 50  $^{\circ}$ C, electrospray ionization (ESI) source; Positive ion mode; Molecular weight range: 100-1200. Solvent acetonitrile/water (gradient: The proportion of acetonitrile in the mobile phase is 5% in 0-5 minutes, increases from 5% to 20% in 5-8 minutes, increases from 20% to 60% in 8-13 minutes, and increases from 60% in 13-18 minutes to 95%, in 18-23 min, the acetonitrile content is kept at 95%, in 23-23.1 min, the acetonitrile content is reduced from 95% to 5%, and in 23.1-30min, the acetonitrile content was 5%), flow rate of 0.5 mL/min, injection volume of 10  $\mu$ L, and run time of 30 min.

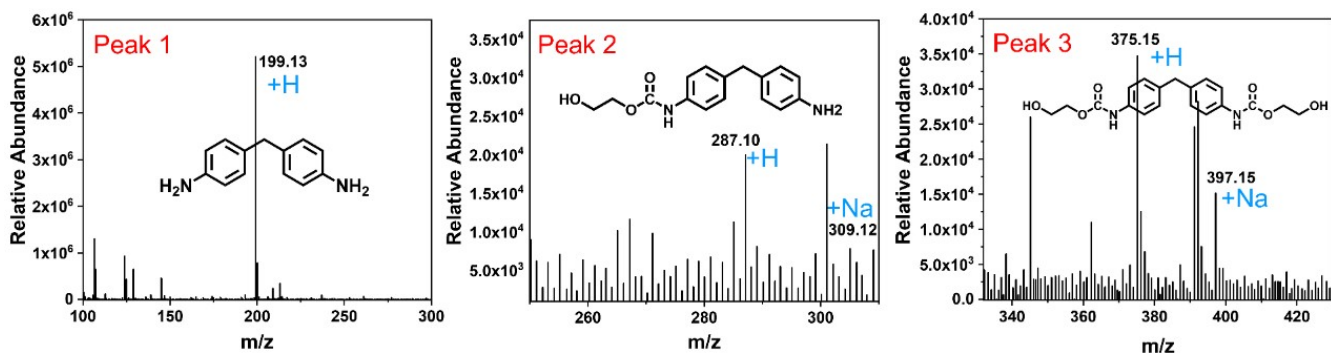

Fig. S2. Mass spectrum of peak 1-3 (containing diphenylmethane group) in the above Fig. S1

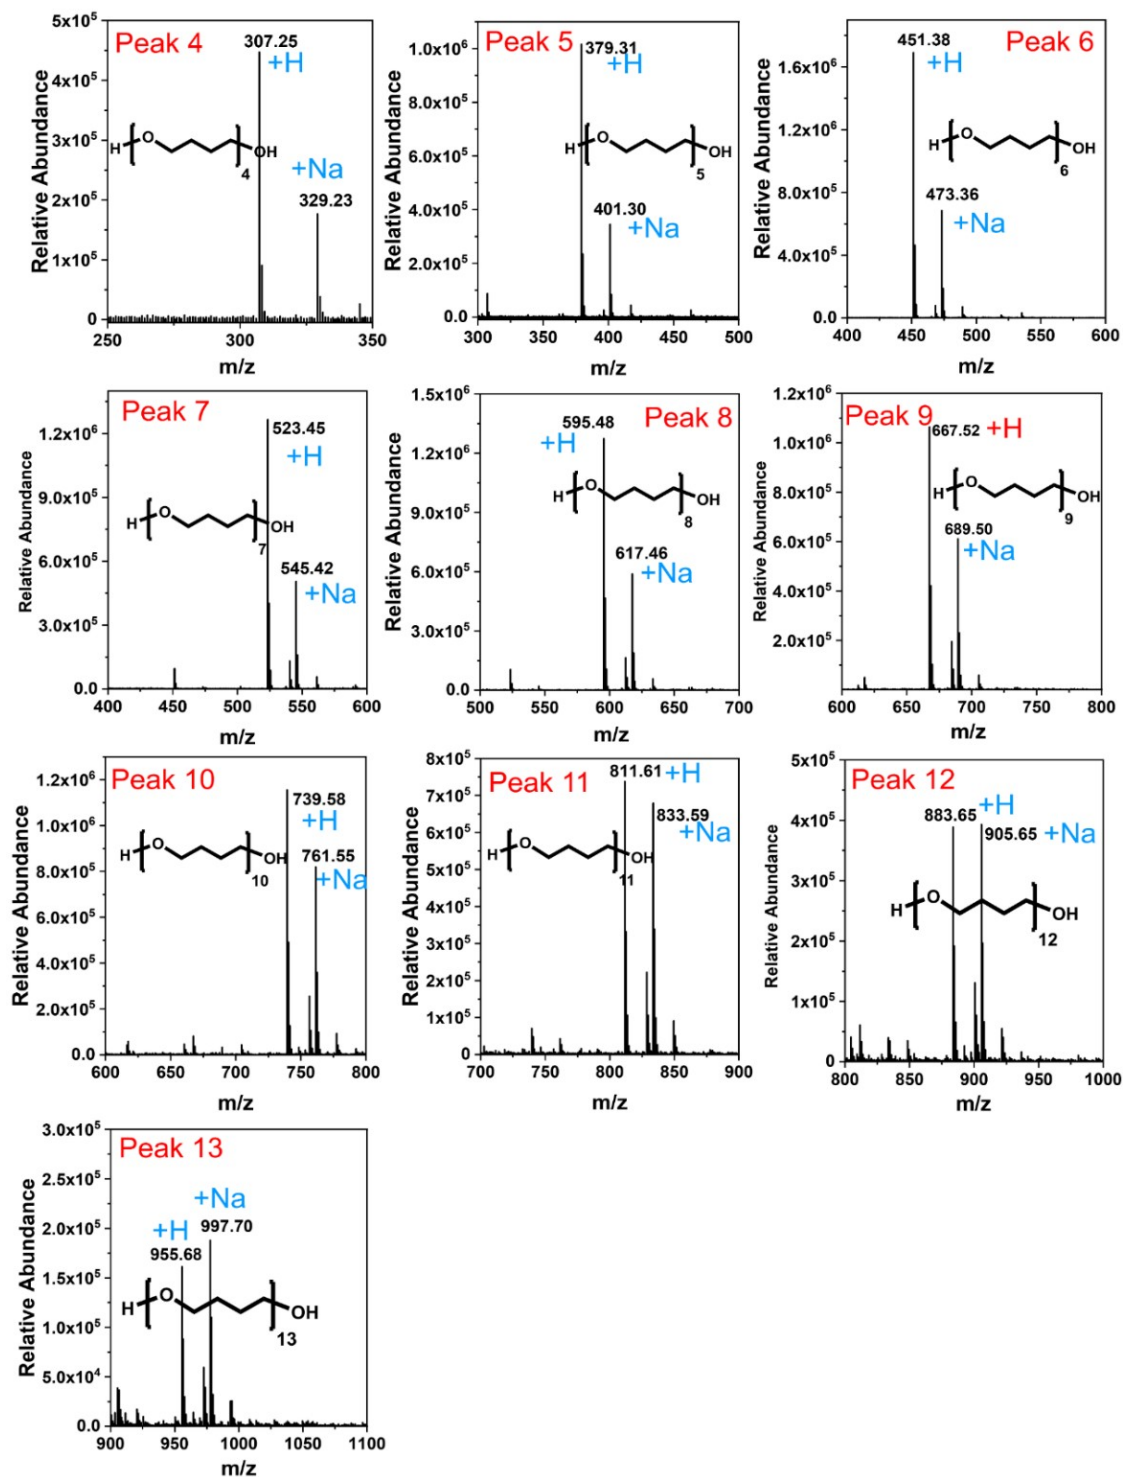

Fig. S3. Mass spectrum of peak 4-13 (polytetrahydrofuran diols) in the above Fig. S1

**Table S2.** Retention time, chemical structure and molecular weight of the peaks in above Fig. S1-S3

| Peak number | Time (min)  | Chemical structure                                                                  | Molecular weight |
|-------------|-------------|-------------------------------------------------------------------------------------|------------------|
| 1           | 2.18-2.48   | 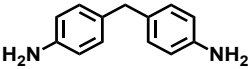   | 198              |
| 2           | 14.27-15.31 |    | 286              |
| 3           | 17.17-17.54 |   | 374              |
| 4           | 17.41-17.54 |    | 306              |
| 5           | 18.36-18.73 |    | 378              |
| 6           | 19.43-19.69 |    | 450              |
| 7           | 19.93-20.30 |    | 522              |
| 8           | 20.50-20.83 |   | 594              |
| 9           | 20.96-21.29 |  | 666              |
| 10          | 21.46-21.62 |  | 738              |
| 11          | 21.74-21.91 |  | 810              |
| 12          | 22.00-22.16 |  | 882              |
| 13          | 22.24-22.49 |  | 954              |

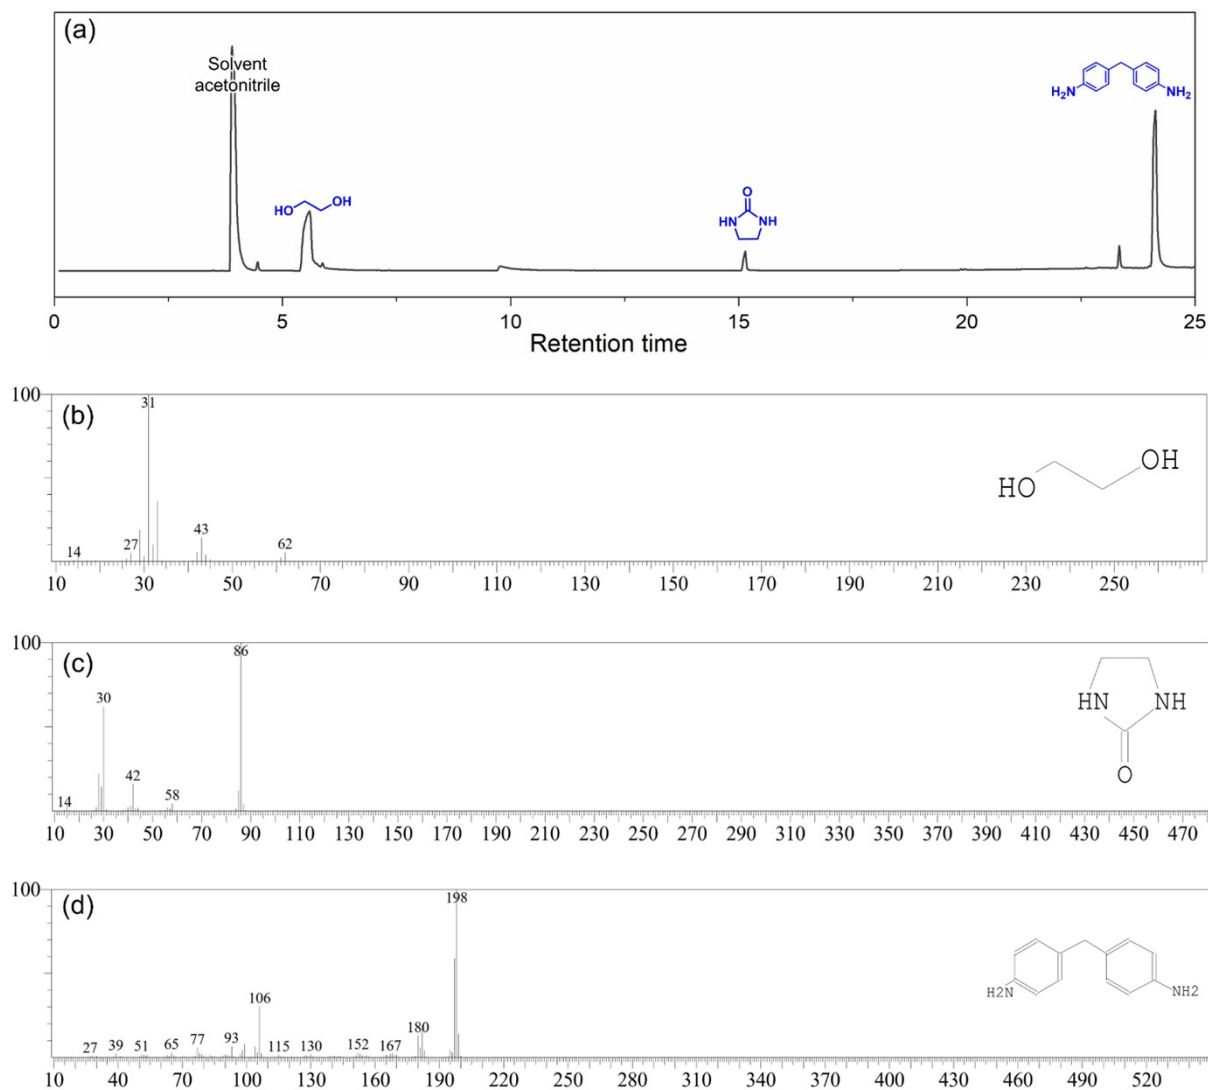

**Fig. S4.** (a) GC-MS chromatogram of the formed glycolysis solution for spandex, (b-d) Mass spectrum of the peaks.

The test conditions are as follows. The instrument model is GCMS-QP2010 Plus (chromatographic column model: DB-17MS; chromatographic column size: 60 m × 250 μm × 0.25 μm). The column temperature is 60 °C, the injection temperature is 300 °C, and the temperature is increased to 300 °C at 12 °C/min. Injection volume: 1 μL, split ratio: 10, solvent: acetonitrile. MS: Scan range 29-550, interval: 0.1 sec, scan speed 781 amu/s.

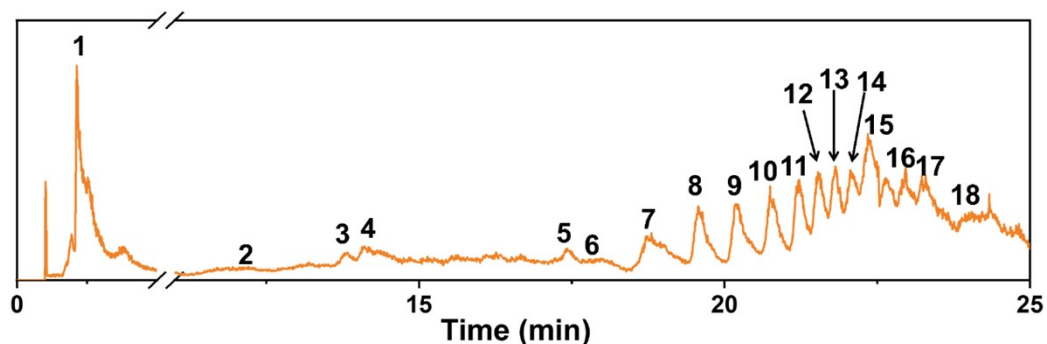

**Fig. S5.** LC-MS chromatogram of the formed solution for spandex after glycolysis and methanol transesterification process. The test conditions are the same as those in Fig. S1.

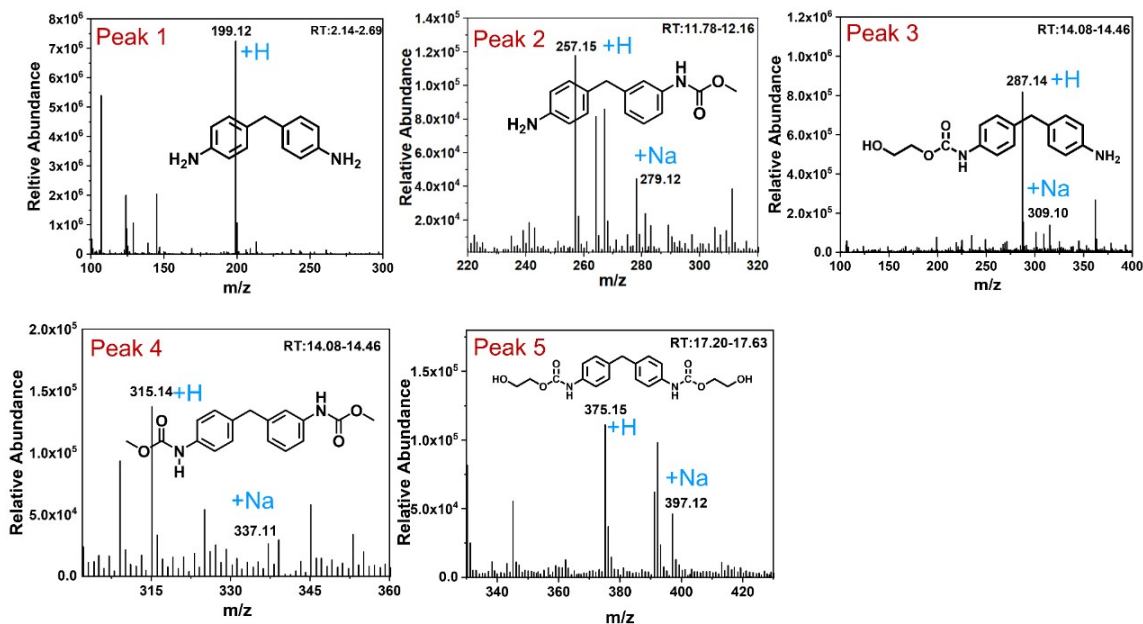

Fig. S6. Mass spectrum of peak 1-5 (containing diphenylmethane group) in the above Fig. S5

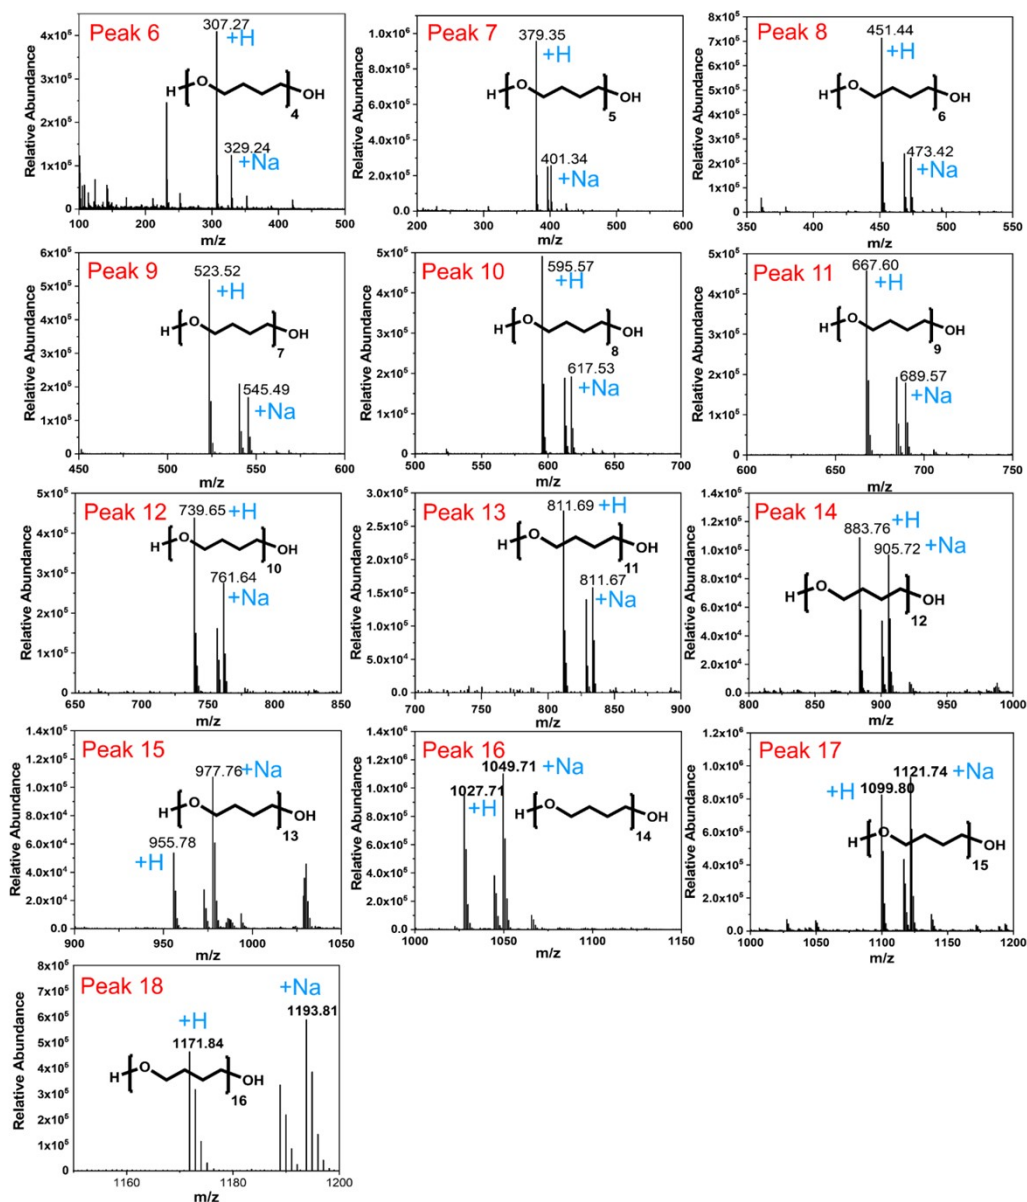

Fig. S7. Mass spectrum of peak 6-18 (polytetrahydrofuran diols) in the above Fig. S5

**Table S3.** Retention time, chemical structure and molecular weight of the peaks in above Fig. S5-S7

| Peak number | Time (min)  | Chemical structure                                                                  | Molecular weight |
|-------------|-------------|-------------------------------------------------------------------------------------|------------------|
| 1           | 2.14-2.69   | 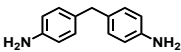   | 198              |
| 2           | 11.78-12.16 |    | 256              |
| 3           | 14.08-14.46 |    | 286              |
| 4           | 14.08-14.60 |    | 314              |
| 5           | 17.20-17.63 |   | 374              |
| 6           | 17.20-17.63 |    | 306              |
| 7           | 18.69-19.07 |    | 378              |
| 8           | 19.46-19.84 |    | 450              |
| 9           | 19.97-20.40 |    | 522              |
| 10          | 20.69-20.86 |   | 594              |
| 11          | 21.08-21.33 |  | 666              |
| 12          | 21.47-21.64 |  | 738              |
| 13          | 21.72-21.93 |  | 810              |
| 14          | 21.93-22.19 |  | 882              |
| 15          | 22.23-22.57 |  | 954              |
| 16          | 22.62-22.79 |  | 1026             |
| 17          | 22.91-23.13 |  | 1098             |
| 18          | 23.21-23.51 |  | 1170             |

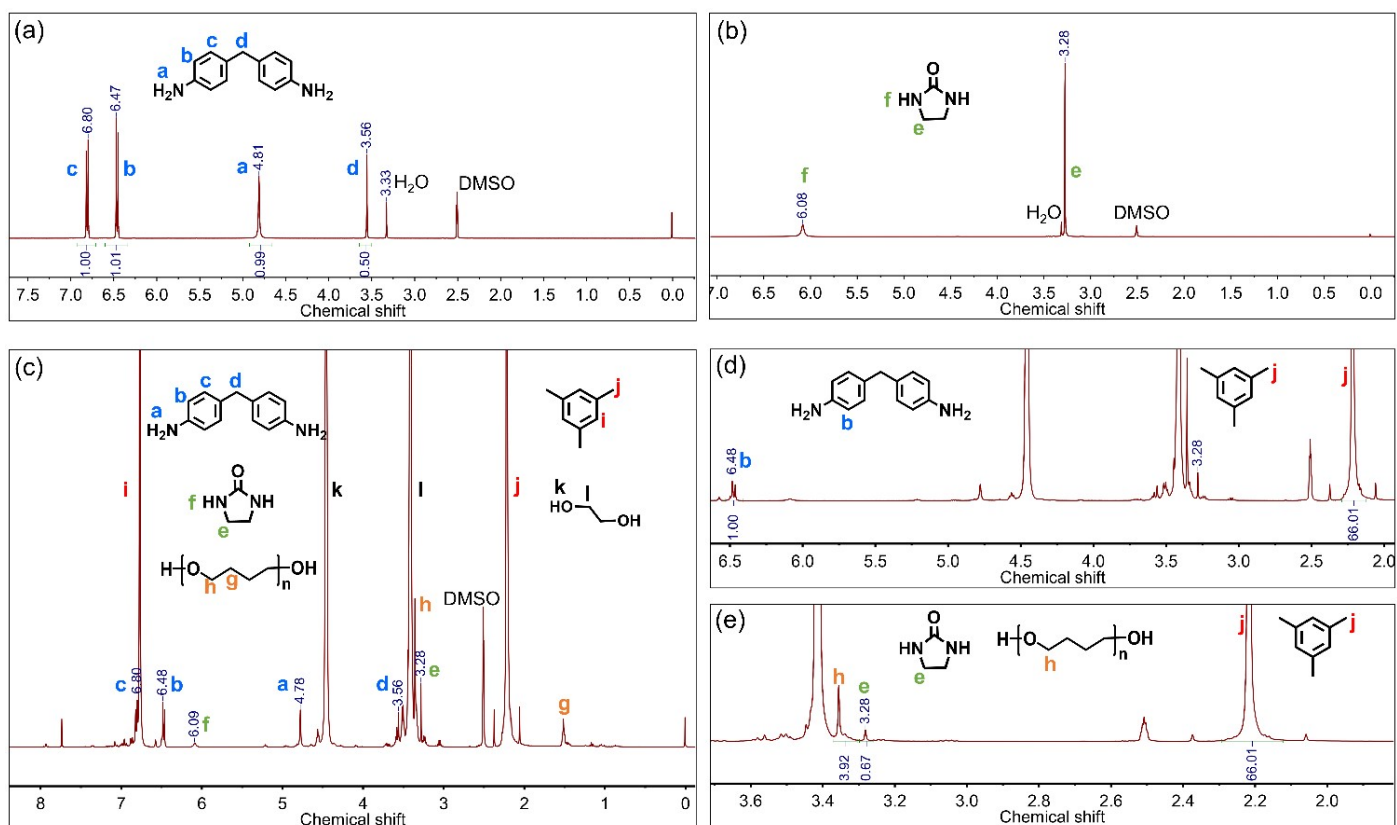

**Fig. S8.**  $^1\text{H}$  NMR (in  $\text{DMSO}-d_6$ ) of purchased 4,4'-methylenedianiline (a), 2-imidazolidinone (b) and formed glycolysis solution for spandex (c-e).

Spandex (5 g), ethylene glycol (7.5 g) and potassium carbonate (0.1 g) were reacted at  $200\text{ }^\circ\text{C}$  for 3 h. After glycolysis, the reaction system of spandex was cooled to room temperature and left for 3 h. It was observed that the system was divided into two layers, the upper layer was the sticky solids layer (polytetrahydrofuran diols), and the lower layer was the solution layer. Use a separating funnel to separate the two parts to obtain the upper layer of polytetrahydrofuran diols (washed with ethanol and dried, and the mass is denoted as  $m_s$ , namely 3.25 g) and the lower solution layer (the mass is denoted as  $m_l$ , namely  $5\text{ g} + 7.5\text{ g} - 3.25\text{ g} = 9.25\text{ g}$ ). The relevant quantitative calculations of products in formed solution for spandex are as follows.

The mass of 4,4'-methylenedianiline, 2-imidazolidinone and polytetrahydrofuran diols in the solution was calculated by nuclear magnetic internal standard method. Take 17.8 mg of the solution and 17.1 mg of the internal standard mesitylene mixed for NMR testing. Take the calculation of the mass of 4,4'-methylenedianiline as an example. Since the signal intensity of hydrogen proton is proportional to the number of hydrogen proton, the ratio of the molar content of 4,4'-methylenedianiline to the molar content of mesitylene is equal to the ratio of their corresponding peak areas (Equation 1).

$$\frac{17.1\text{ mg}/M_0 \times 9}{m_1/M_1 \times 4} = 66.01$$

Equation 1

Where  $M_0$  is the molar mass of mesitylene (120 g/mol),  $M_1$  is the molar mass of 4,4'-methylenedianiline (198 g/mol),  $m_1$  is the actual mass of 4,4'-methylenedianiline in the 17.8 mg solution. 66.01 (Figure S8d) is the ratio of the integrated areas of peak j (9 hydrogens) in mesitylene to peak b (4 hydrogens) in 4,4'-methylenedianiline. Based on the above Equation 1,  $m_1$  can be calculated, and then the total mass of 4,4'-methylenedianiline in the solution is calculated as 0.50 g. Similarly, according to the integral area ratio, the masses of 2-imidazolidinone and polytetrahydrofuran in the solution are calculated as 0.15 g and 0.71 g, respectively.

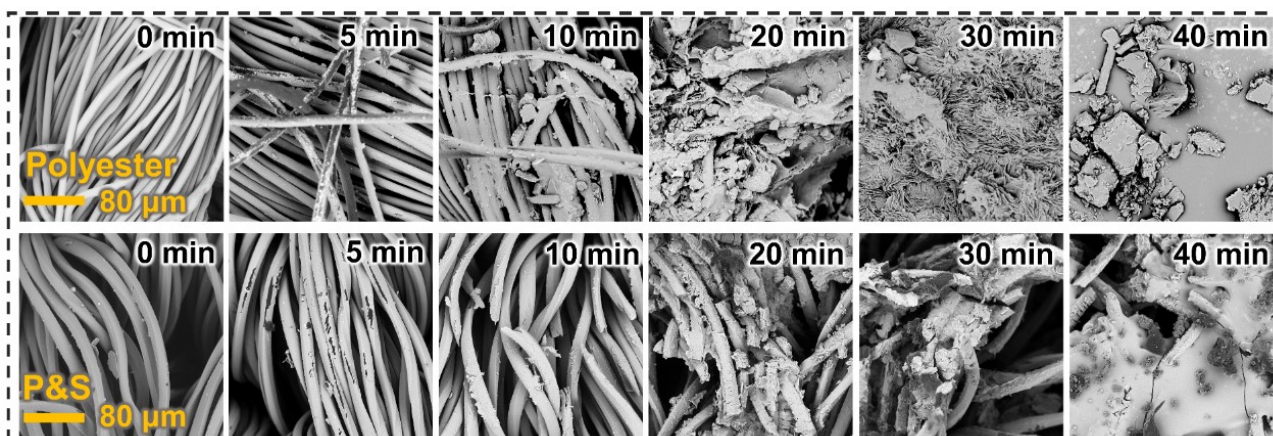

**Fig. S9.** SEM images of polyester fabric and polyester-spandex (P&S) blended fabric during glycolysis at different reaction time

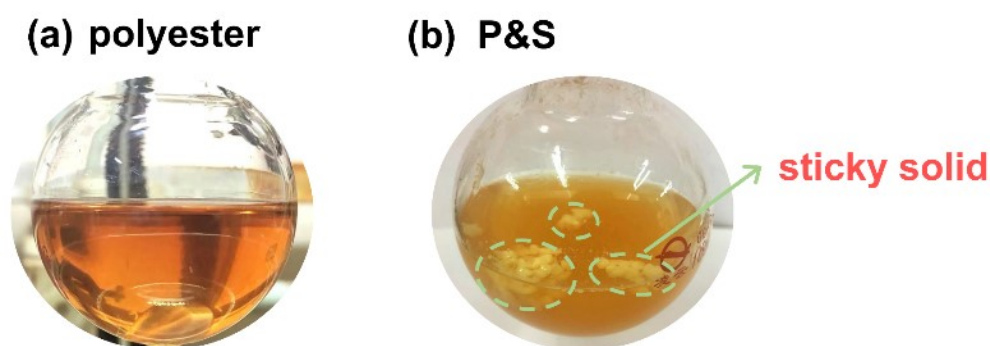

**Fig. S10.** Photos of polyester fabric and polyester-spandex (P&S) blended fabric after glycolysis reaction for 3h

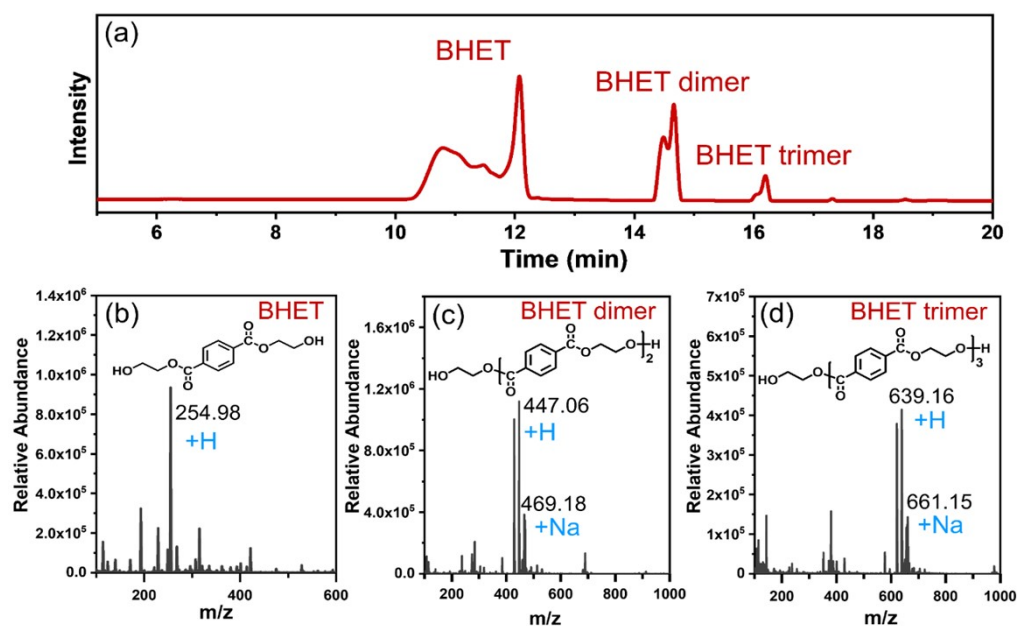

**Fig. S11.** (a) LC-MS chromatogram of the formed glycolysis solution for polyester fabric, (b-d) Mass spectrum of the peaks. The test conditions are the same as those in Fig. S1.



**Table S4.** Retention time, chemical structure and molecular weight of the peaks in above Fig. S11

| Time (min)  | Chemical structure                                                                | Molecular weight |
|-------------|-----------------------------------------------------------------------------------|------------------|
| 10.20-12.18 | 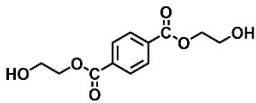 | 254              |
| 14.31-14.78 |  | 446              |
| 15.91-16.24 |  | 638              |

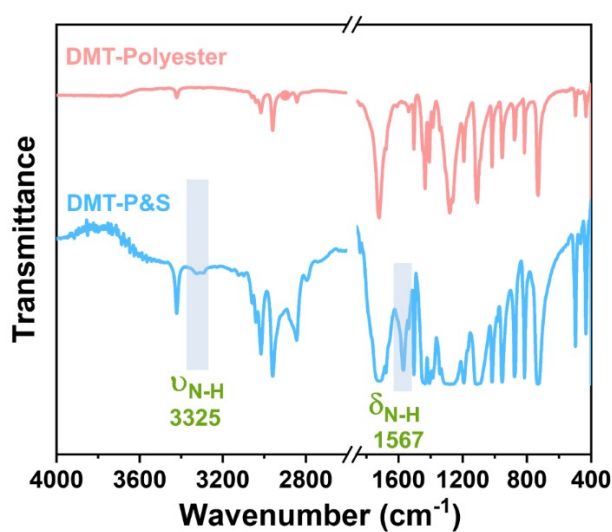**Fig. S12.** FT-IR spectra of crude DMT from polyester fabric and P&S fabric**Table S5.** Organic element analysis results of crude DMT come from polyester fabric and P&S fabric

| Sample                            | C (%) | H (%) | N (%) |
|-----------------------------------|-------|-------|-------|
| theoretical DMT                   | 61.86 | 5.15  | 0     |
| crude DMT obtained from polyester | 62.08 | 5.13  | 0     |
| crude DMT obtained from P&S       | 61.72 | 5.61  | 0.22  |

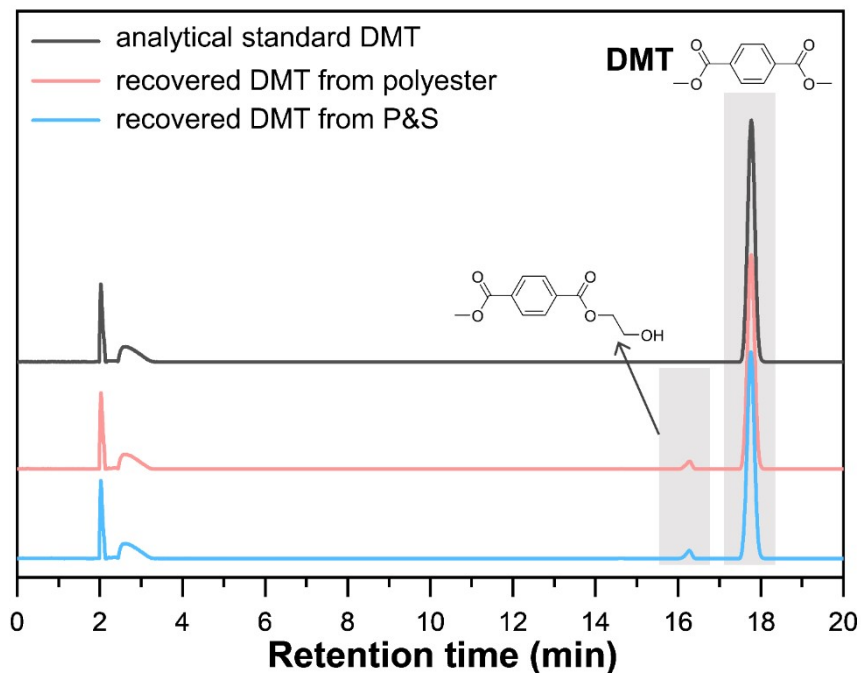

**Fig. S13.** HPLC chromatogram of analytical standard DMT, recovered DMT form polyester and recovered DMT from P&S. (High performance liquid chromatography (HPLC), separation was carried out on a Hypersil Gold column (150 mm × 2.1 mm, 5 μm, Thermo), column temperature = 30 °C, detector temperature = 50 °C. Solvent methanol/water (gradient: The proportion of methanol in the mobile phase is 5% in 0-5 minutes, increases from 5% to 20% in 5-8 minutes, increases from 20% to 60% in 8-13 minutes, and increases from 60% in 13-18 minutes to 95%, in 18-23 min, the methanol content is kept at 95%, in 23-23.1 min, the methanol content is reduced from 95% to 5%, and in 23.1-30min, the methanol content was 5%), flow rate of 0.5 mL/min, injection volume of 10 μL, and run time of 30 min. In HPLC testing, peak area is proportional to concentration. According to the concentration and peak area of the analytical standard DMT, as well as the peak area of recovered DMT form polyester or P&S, the DMT concentration in recovered DMT form polyester or P&S is calculated.)

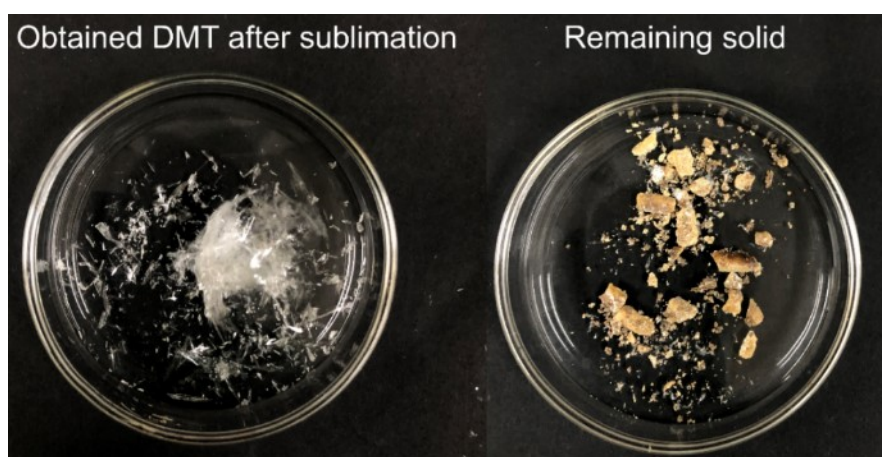

**Fig. S14.** For crude DMT come from P&S fabric, digital photos of obtained DMT after sublimation and remaining solid

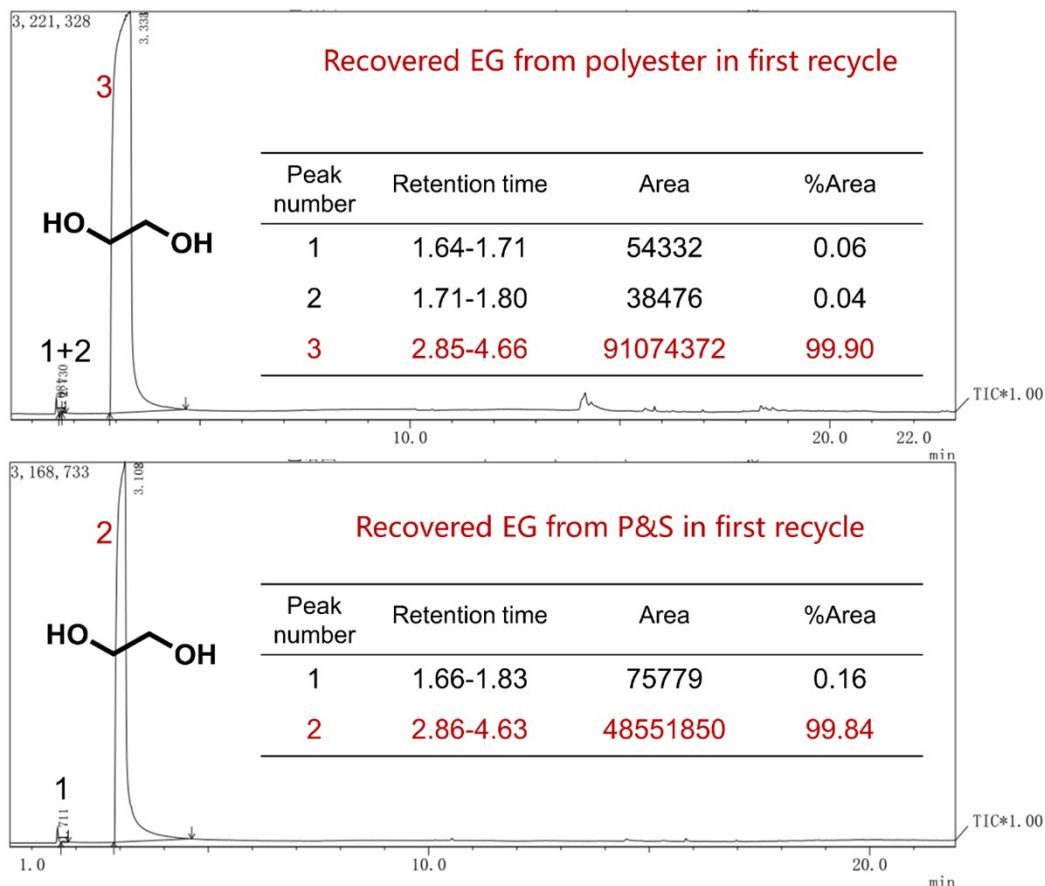

**Fig. S15.** GC-MS chromatogram of recovered EG form polyester and recovered EG from P&S in first recycle. Gas chromatography-mass spectrometer (GCMS-QP2010 Plus), column temperature = 50 °C, injection temperature=290 °C, after diluting the sample 100 times, injection volume of 0.2  $\mu$ L.

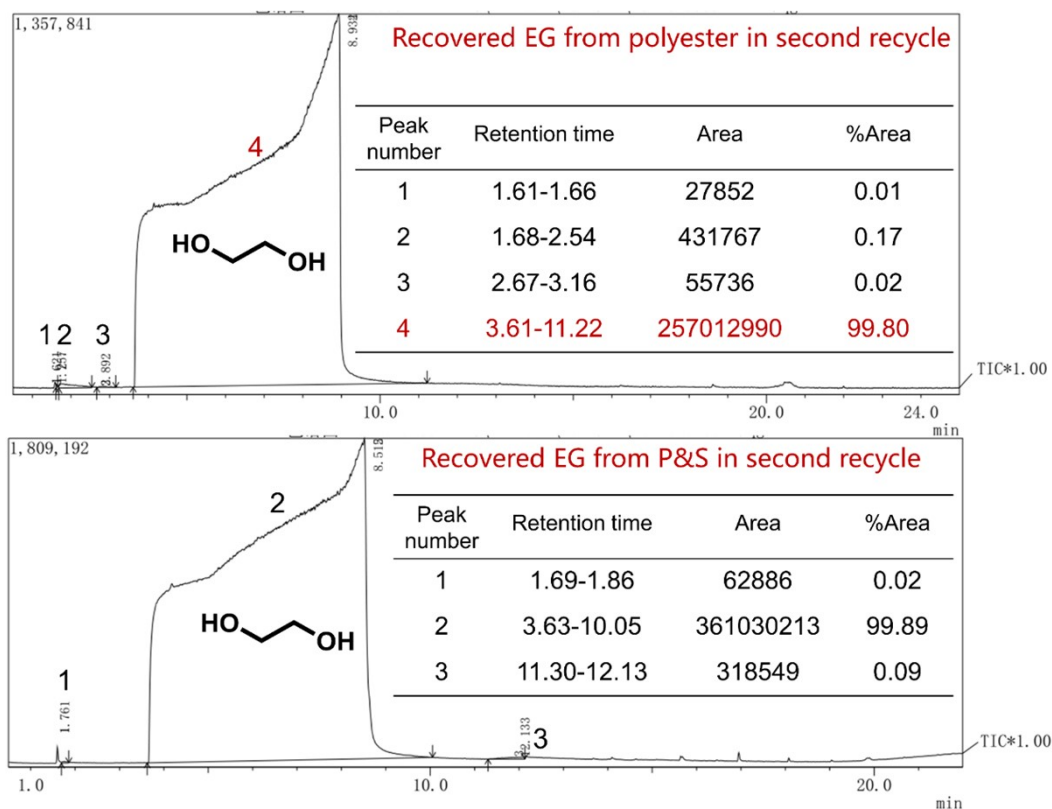

**Fig. S16.** GC-MS chromatogram of recovered EG form polyester and recovered EG from P&S in second recycle. The test conditions are the same as those in Fig. S15.

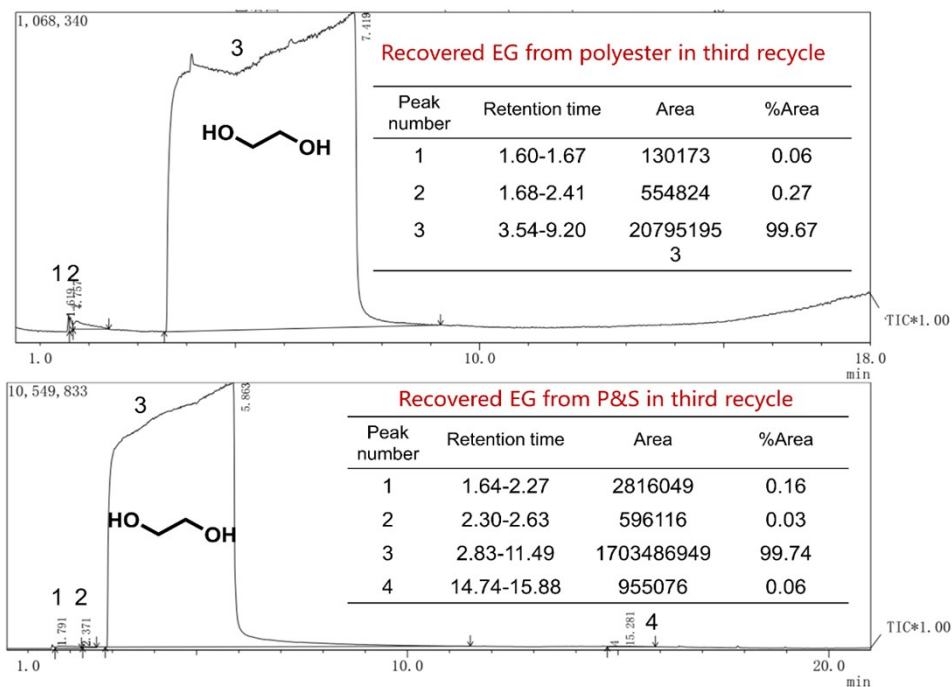

**Fig. S17.** GC-MS chromatogram of recovered EG form polyester and recovered EG from P&S in third recycle. The test conditions are the same as those in Fig. S15.

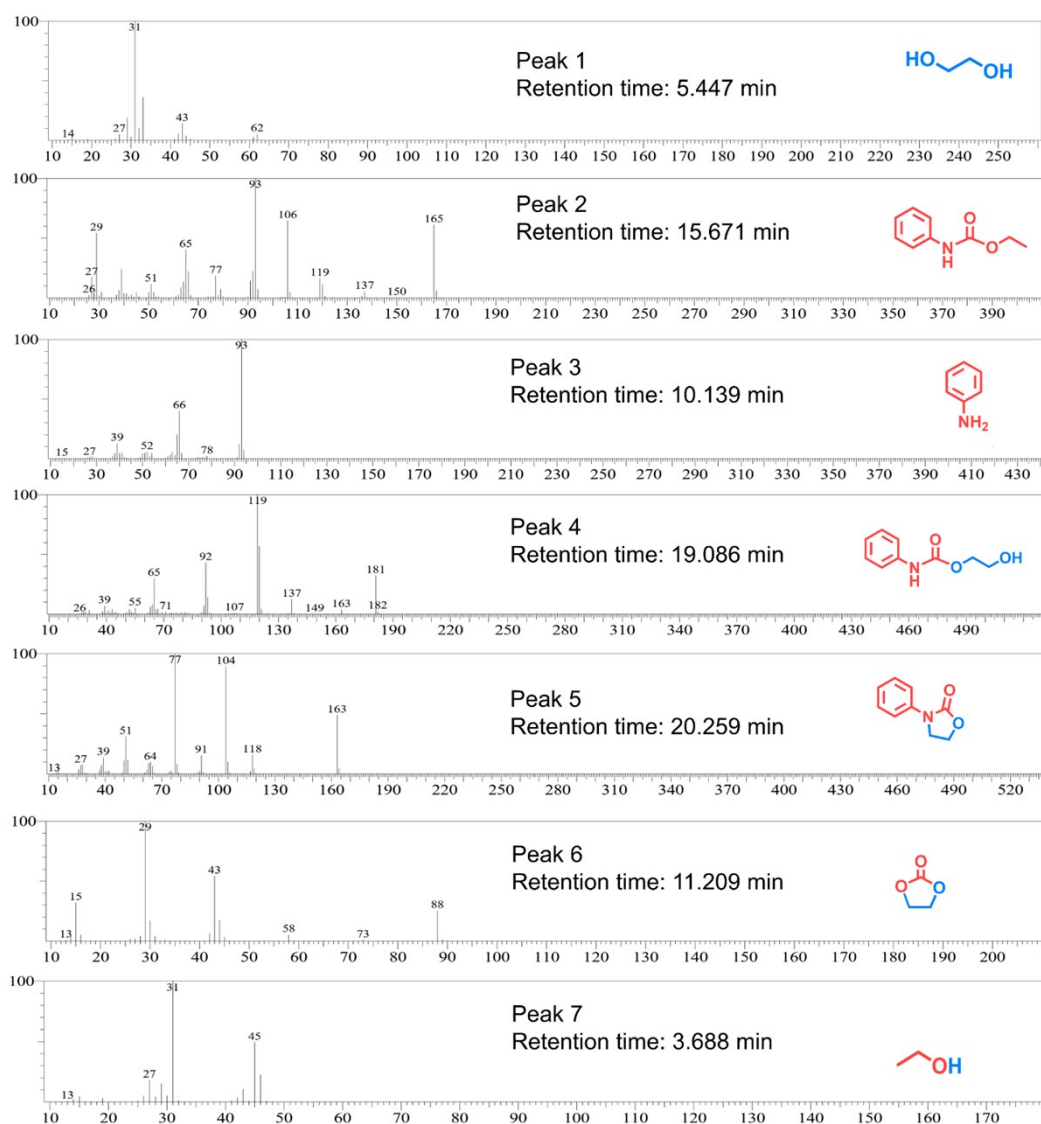

**Fig. S18.** Mass spectrum of peaks in Figure 5(a). The test conditions are the same as those in Figure S4.

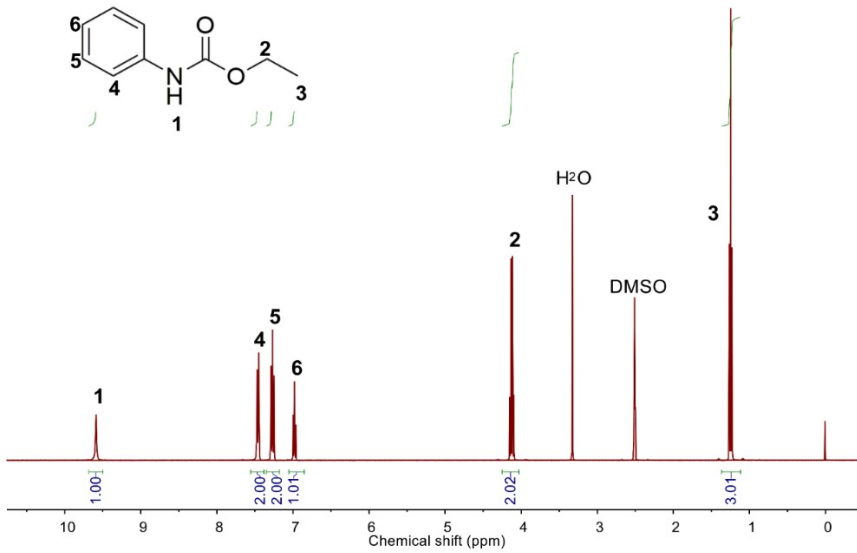

**Fig. S19.**  $^1\text{H}$  NMR (in  $\text{DMSO-}d_6$ ) spectrum of purchased phenylurethane

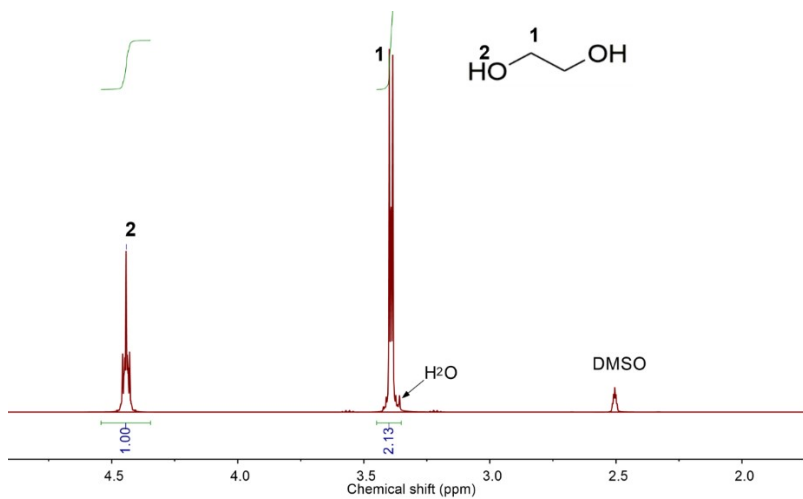

**Fig. S20.**  $^1\text{H}$  NMR (in  $\text{DMSO-}d_6$ ) spectrum of purchased ethylene glycol

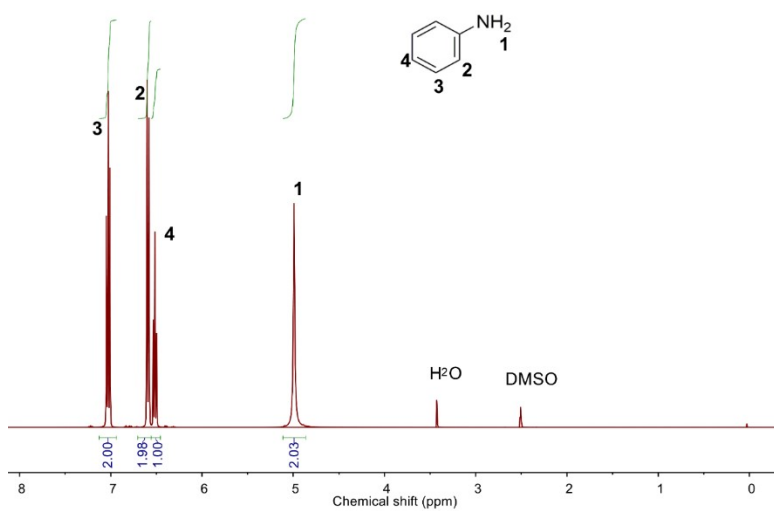

**Fig. S21.**  $^1\text{H}$  NMR (in  $\text{DMSO-}d_6$ ) spectrum of purchased aniline

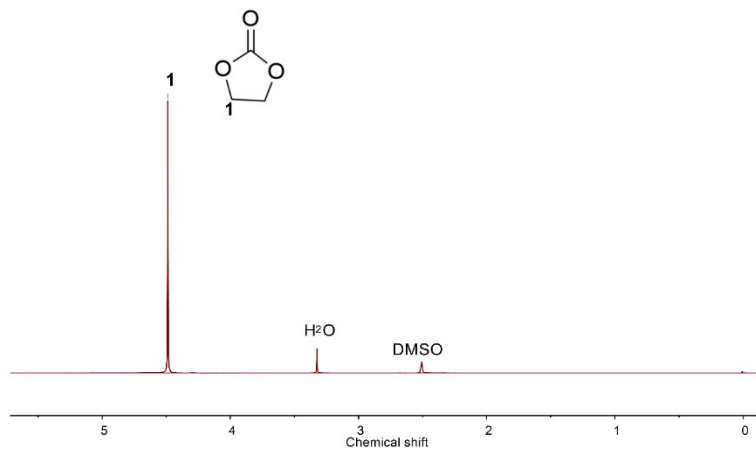

**Fig. S22.**  $^1\text{H}$  NMR (in  $\text{DMSO-}d_6$ ) spectrum of purchased ethylene carbonate

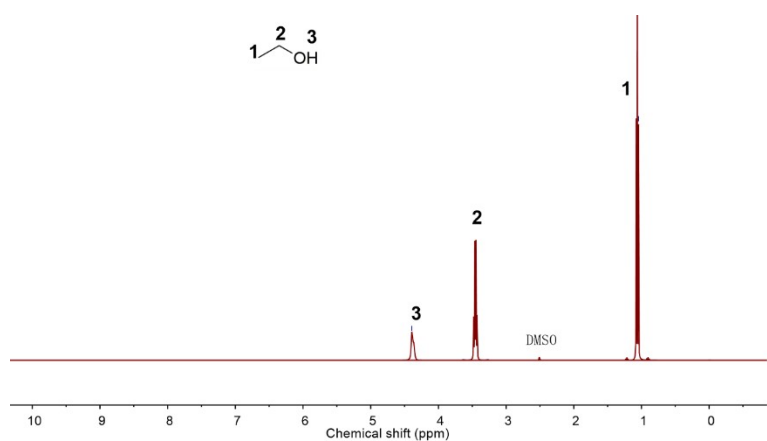

**Fig. S23.**  $^1\text{H}$  NMR (in  $\text{DMSO-}d_6$ ) spectrum of purchased ethanol

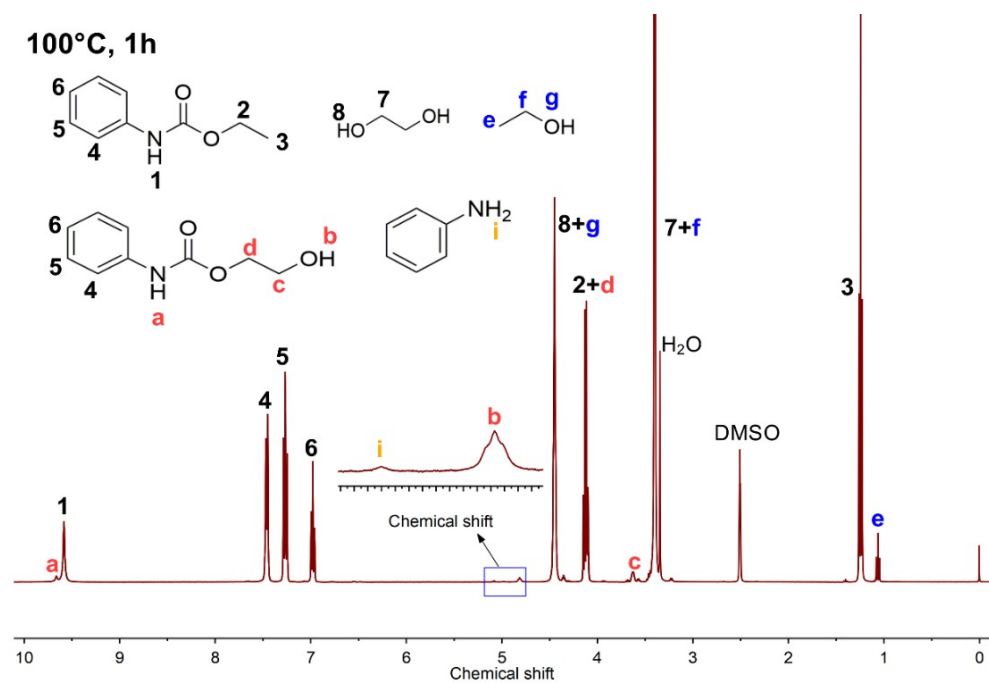

**Fig. S24.**  $^1\text{H}$  NMR (in  $\text{DMSO-}d_6$ ) spectrum of the obtained mixture after the reaction of phenylurethane and ethylene glycol at  $100\text{ }^\circ\text{C}$  for 1 h

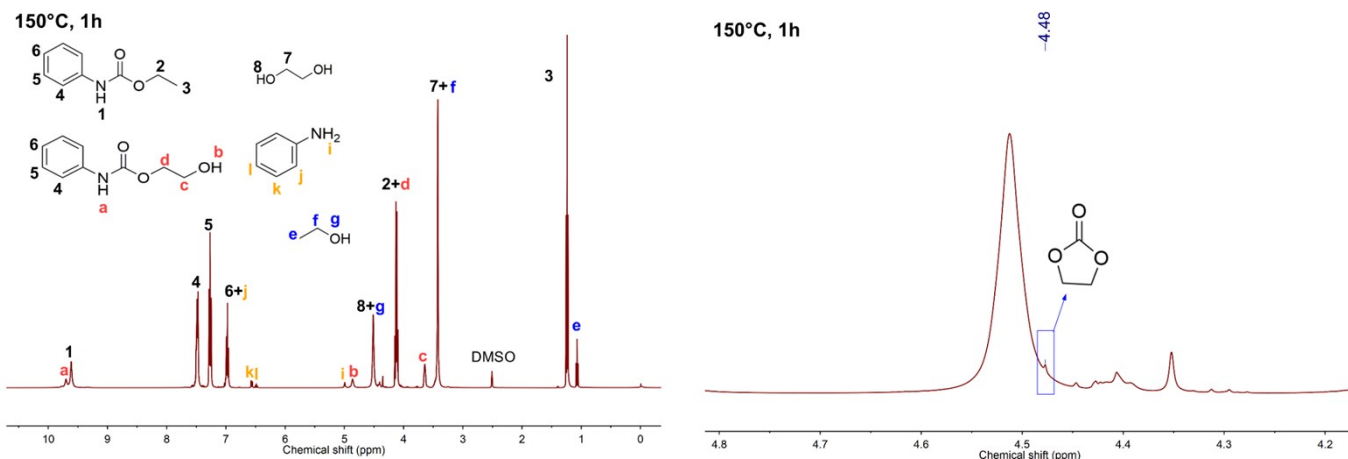

**Fig. S25.**  $^1\text{H}$  NMR (in  $\text{DMSO-}d_6$ ) spectrum of the obtained mixture after the reaction of phenylurethane and ethylene glycol at  $150\text{ }^\circ\text{C}$  for 1 h

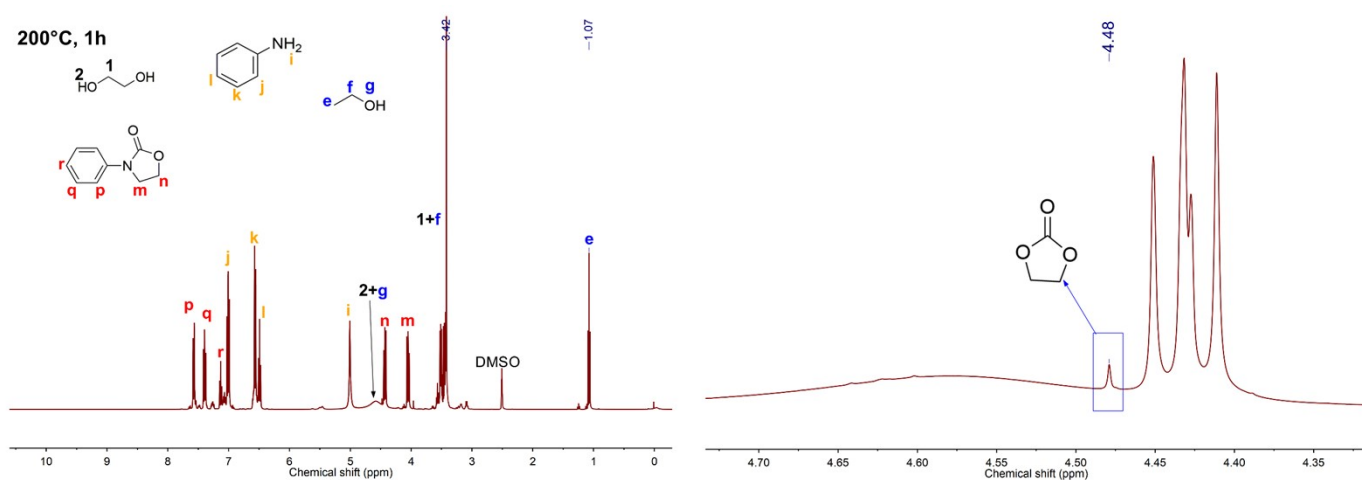

**Fig. S26.**  $^1\text{H}$  NMR (in  $\text{DMSO-}d_6$ ) spectrum of the obtained mixture after the reaction of phenylurethane and ethylene glycol at  $200\text{ }^\circ\text{C}$  for 1 h

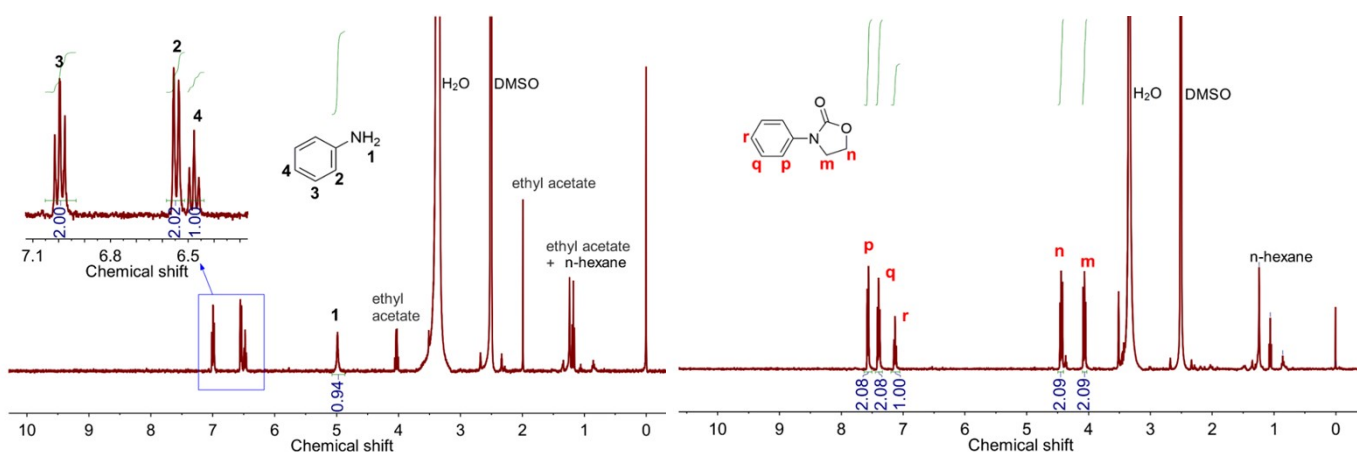

**Fig. S27.**  $^1\text{H}$  NMR (in  $\text{DMSO-}d_6$ ) spectrum of separated aniline and 3-phenyl-2-oxazolidinone from the reaction mixture ( $200\text{ }^\circ\text{C}$  for 1 h). The separation steps are as follows. Step 1, the product was separated by thin-layer chromatography on silica gel in a developing solvent (volume ratio ethyl acetate:n-hexane=1:2). Step 2, the product adsorbed on the silica gel was scraped off and ground, and ethyl acetate was added to dissolve it. Step 3, prepare a filter device with diatomaceous earth, and wash the impurities in the diatomaceous earth with ethyl acetate. Step 4, the ethyl acetate with the product was filtered to remove the silica gel. Step 5: Spin the solution to dry to obtain the product

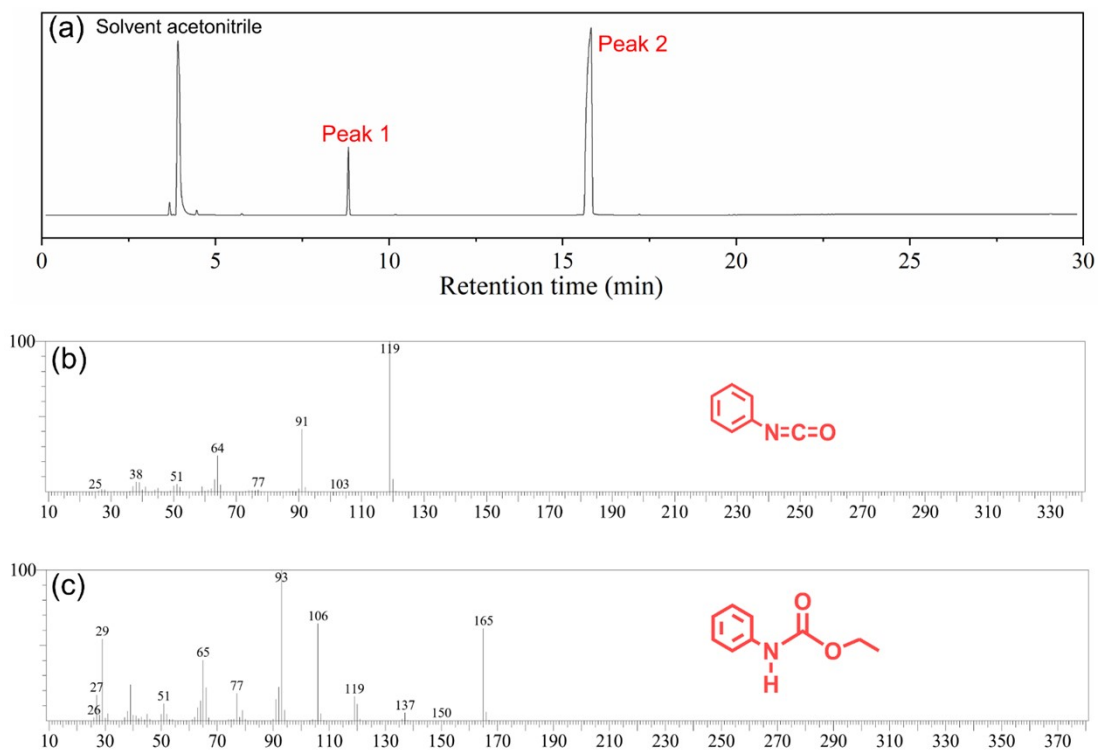

**Fig. S28.** (a) GC-MS chromatogram of reactant phenylurethane, (b) Mass spectrum of the peak 1, (c) Mass spectrum of the peak 2. The test conditions are the same as those in Fig. S4.

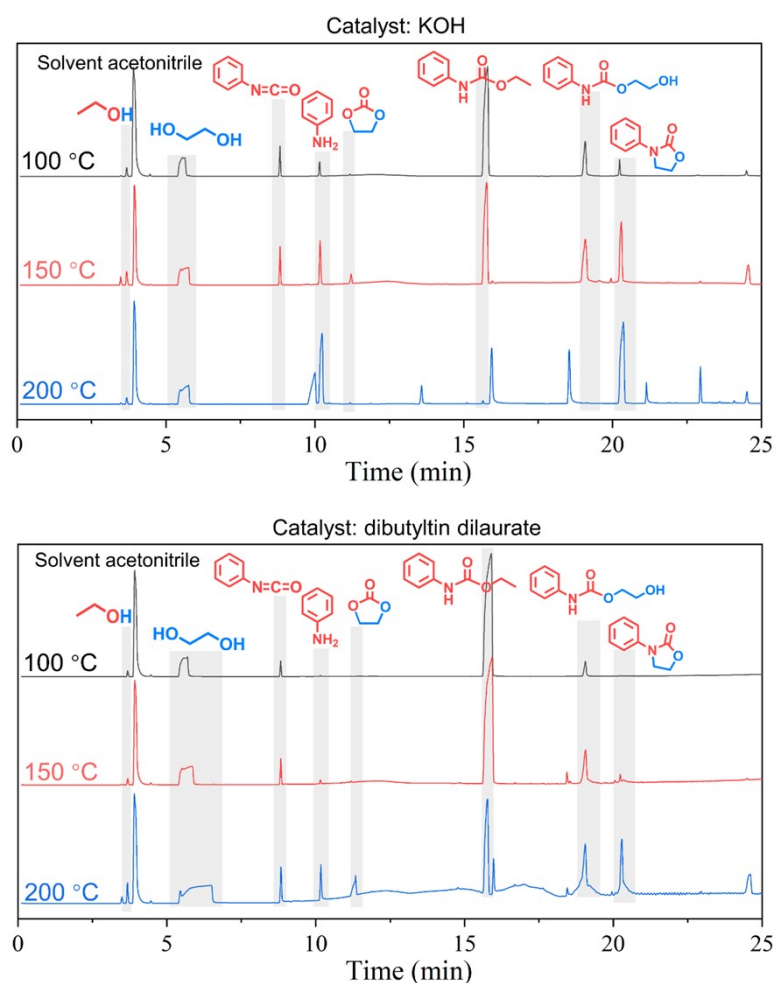

**Fig. S29.** (a) GC-MS of formed solutions after the reaction of phenylurethane with ethylene glycol (under different catalyst) at different temperatures for 1 h. Test conditions are the same as those in Fig. S4.



## Optimised Cartesian Coordinates for Phenylurethane Glycolysis.

### Reactants complex:

|   |             |             |             |
|---|-------------|-------------|-------------|
| O | 1.84183800  | 0.79826100  | -1.51067100 |
| H | 0.87875300  | 1.66763200  | -0.43895700 |
| C | 2.83044000  | 0.09347200  | -1.04132600 |
| O | 2.98566300  | -1.12852300 | -1.45230500 |
| O | 3.64067600  | 0.59536200  | -0.17161300 |
| C | -5.99013400 | 0.16187200  | -0.98399000 |
| H | -6.88278800 | 0.40456500  | -1.54846700 |
| C | -5.80409600 | 0.67679600  | 0.29996600  |
| H | -6.55232100 | 1.32427600  | 0.74299800  |
| C | -4.65671100 | 0.36869800  | 1.02244200  |
| H | -4.51517900 | 0.77237800  | 2.01956800  |
| C | -3.67449400 | -0.46618200 | 0.46987100  |
| C | -3.86074800 | -0.99289800 | -0.81373100 |
| H | -3.12117100 | -1.64868300 | -1.24673000 |
| C | -5.01463000 | -0.67077200 | -1.52859700 |
| H | -5.14724400 | -1.08420300 | -2.52223200 |
| N | -2.55210700 | -0.74920500 | 1.27832700  |
| H | -2.60290700 | -0.42408800 | 2.23591700  |
| C | -1.36572900 | -1.30787500 | 0.92290600  |
| O | -0.55823500 | -1.39334000 | 2.00048400  |
| O | -1.05344500 | -1.69559100 | -0.19760400 |
| C | 0.77137300  | -1.95420000 | 1.78941300  |
| H | 0.66084600  | -2.95012000 | 1.35773300  |
| H | 1.30378100  | -1.31268200 | 1.08623800  |
| C | 1.46202600  | -1.99955200 | 3.13330400  |
| H | 0.91218700  | -2.62759700 | 3.83858500  |
| H | 1.56757700  | -0.99826400 | 3.55740800  |
| H | 2.46131100  | -2.42499200 | 3.00608700  |
| O | 0.22737400  | 2.12949700  | 0.15386900  |
| C | 0.88452500  | 3.22249400  | 0.79398300  |
| H | 0.27298500  | 3.51447200  | 1.65374900  |
| H | 1.87002100  | 2.91937600  | 1.16614900  |
| C | 1.03660100  | 4.41466700  | -0.14731800 |
| H | 0.05650100  | 4.70387400  | -0.54298300 |
| H | 1.68330600  | 4.15275700  | -0.98719800 |
| O | 1.66247200  | 5.53110100  | 0.50686800  |
| H | 1.07020100  | 5.84162800  | 1.20352800  |
| K | 0.46080600  | -1.29158800 | -2.32214000 |
| K | 5.02696200  | -1.57994600 | 0.12932700  |

### Transition state TS1:

|   |             |             |             |
|---|-------------|-------------|-------------|
| O | 1.88326900  | 0.51262900  | -1.46389000 |
| H | 1.16230900  | 0.44594600  | -0.78873200 |
| C | 3.10595400  | 0.73375600  | -0.85654300 |
| O | 4.04187000  | 1.04005200  | -1.63396400 |
| O | 3.17990700  | 0.58959400  | 0.39077500  |
| C | -4.84527700 | 2.49596800  | -1.06537900 |
| H | -5.45307400 | 3.32868300  | -1.39975200 |
| C | -5.11401000 | 1.86080800  | 0.14952600  |
| H | -5.93603400 | 2.19965500  | 0.77119700  |
| C | -4.33239700 | 0.79407400  | 0.57956600  |
| H | -4.54888500 | 0.31091700  | 1.52774800  |
| C | -3.25612600 | 0.32386800  | -0.19872900 |
| C | -2.98934900 | 0.96649800  | -1.42031300 |
| H | -2.17069800 | 0.62415600  | -2.03687500 |
| C | -3.77815400 | 2.03799800  | -1.83782500 |
| H | -3.54997800 | 2.51827000  | -2.78371100 |
| N | -2.53532200 | -0.78277100 | 0.26731700  |
| H | -2.69057000 | -0.95986700 | 1.25141400  |
| C | -1.16670800 | -1.08587400 | -0.14815100 |
| O | -0.68196900 | -2.11423800 | 0.78900200  |
| O | -0.99335400 | -1.37737900 | -1.39129200 |
| C | -1.36988300 | -3.37961700 | 0.74234700  |
| H | -2.37150300 | -3.27276100 | 1.17085500  |
| H | -1.48299900 | -3.69979600 | -0.29896600 |
| C | -0.57037600 | -4.39374100 | 1.53926600  |
| H | -0.44778100 | -4.06877000 | 2.57591600  |
| H | 0.42318500  | -4.55855600 | 1.11100400  |
| H | -1.09595900 | -5.35274400 | 1.54277900  |
| O | -0.25733000 | 0.05917600  | 0.19492000  |
| C | -0.21670100 | 0.53947700  | 1.54579300  |
| H | -1.15171700 | 0.30903600  | 2.06344100  |
| H | 0.60461000  | 0.06452100  | 2.09149300  |
| C | -0.02057100 | 2.05123900  | 1.51270100  |
| H | -0.84733000 | 2.52353800  | 0.97246000  |
| H | 0.91288900  | 2.30340300  | 1.00721900  |
| O | 0.08673300  | 2.58861900  | 2.84018200  |
| H | -0.76410600 | 2.47579000  | 3.28293200  |
| K | 1.43855900  | -2.29599500 | -1.17067600 |
| K | 5.74057100  | 1.36092300  | 0.38167300  |

**Intermediate:**

|   |             |             |             |
|---|-------------|-------------|-------------|
| O | 1.86552200  | 0.04026100  | -1.39946600 |
| H | 1.14264500  | 0.27743600  | -0.75912000 |
| C | 3.10202800  | 0.35145100  | -0.88869800 |
| O | 4.07896300  | 0.03296900  | -1.61423900 |
| O | 3.15757400  | 0.91439000  | 0.23505100  |
| C | -5.48266800 | 0.88941200  | -1.39621800 |
| H | -6.30632000 | 1.27637500  | -1.98483200 |
| C | -5.51736800 | 0.94190200  | -0.00038300 |
| H | -6.37277700 | 1.37522200  | 0.50719100  |
| C | -4.45974100 | 0.44655900  | 0.75389300  |
| H | -4.49727600 | 0.49574500  | 1.83805500  |
| C | -3.32930800 | -0.12547800 | 0.13500900  |
| C | -3.29934800 | -0.17380600 | -1.27053900 |
| H | -2.44746000 | -0.60865500 | -1.77316300 |
| C | -4.36512200 | 0.33031200  | -2.01558200 |
| H | -4.31550500 | 0.28129400  | -3.09852400 |
| N | -2.32244800 | -0.64814800 | 0.95207200  |
| H | -2.38010500 | -0.30927200 | 1.90381200  |
| C | -0.92832600 | -0.84084800 | 0.52079300  |
| O | -0.19258700 | -1.09267900 | 1.75253200  |
| O | -0.74805200 | -1.69446400 | -0.42689300 |
| C | -0.30463500 | -2.42371400 | 2.28039100  |
| H | -1.35147800 | -2.64519500 | 2.51648600  |
| H | 0.03257200  | -3.14659600 | 1.53128900  |
| C | 0.55078600  | -2.51230400 | 3.53021000  |
| H | 0.21149100  | -1.80525100 | 4.29233200  |
| H | 1.59956600  | -2.30130100 | 3.30343000  |
| H | 0.48836500  | -3.52075200 | 3.94921400  |
| O | -0.35537900 | 0.47722900  | 0.08535900  |
| C | -0.39077700 | 1.58289700  | 0.99489300  |
| H | -1.36655100 | 1.64028900  | 1.48859200  |
| H | 0.38300400  | 1.47932800  | 1.76177700  |
| C | -0.15705600 | 2.85401900  | 0.18729600  |
| H | -0.92903200 | 2.95794700  | -0.58213300 |
| H | 0.81738100  | 2.81876400  | -0.30234500 |
| O | -0.13459500 | 4.01204300  | 1.03582200  |
| H | -1.01742100 | 4.13014300  | 1.40837500  |
| K | 0.96504700  | -2.36461100 | -2.14439500 |

|   |            |            |            |
|---|------------|------------|------------|
| K | 5.80777900 | 0.92782800 | 0.19720200 |
|---|------------|------------|------------|

**Transition state TS2-b:**

|   |             |             |             |
|---|-------------|-------------|-------------|
| O | 2.36141000  | -0.52253600 | -1.76591400 |
| H | 1.52039100  | -0.31824700 | -1.27881000 |
| C | 3.45704300  | -0.34266600 | -0.95622200 |
| O | 3.27396300  | 0.03963900  | 0.22988600  |
| O | 4.56973200  | -0.58484000 | -1.49520600 |
| C | -0.87988700 | 4.19967600  | -0.44766400 |
| H | -1.03099100 | 5.26859900  | -0.35072200 |
| C | -1.47023000 | 3.49447100  | -1.49655000 |
| H | -2.08672000 | 4.01314800  | -2.22263300 |
| C | -1.28540700 | 2.11836600  | -1.61457100 |
| H | -1.76013200 | 1.57547000  | -2.42536200 |
| C | -0.48974200 | 1.41996200  | -0.69437500 |
| C | 0.13115300  | 2.13929300  | 0.33973300  |
| H | 0.79394900  | 1.62480400  | 1.02174400  |
| C | -0.07870500 | 3.51313000  | 0.46565500  |
| H | 0.40843800  | 4.05118700  | 1.27179300  |
| N | -0.27424800 | 0.02234200  | -0.85371300 |
| H | -0.70904600 | -0.29202700 | -1.71696200 |
| C | -0.72477100 | -0.87445800 | 0.25885700  |
| O | -0.54706300 | -2.16992700 | -0.33965100 |
| O | -0.16600200 | -0.67208100 | 1.39997000  |
| C | -0.77448700 | -3.28210400 | 0.54096300  |
| H | -0.09513300 | -3.21616800 | 1.39527100  |
| H | -1.80152900 | -3.24871000 | 0.92067800  |
| C | -0.53380400 | -4.56037900 | -0.23860500 |
| H | 0.49267500  | -4.60401700 | -0.61280900 |
| H | -1.21742000 | -4.64058200 | -1.08828900 |
| H | -0.69640500 | -5.42423100 | 0.41218500  |
| O | -2.21290000 | -0.67865900 | 0.45642200  |
| C | -3.10342400 | -1.01897800 | -0.60406700 |
| H | -2.82770100 | -0.51039600 | -1.53647700 |
| H | -3.09547900 | -2.09823300 | -0.78841500 |
| C | -4.50352700 | -0.58121100 | -0.19128200 |
| H | -4.52418300 | 0.49798300  | -0.00328600 |
| H | -4.80702800 | -1.09888300 | 0.72068000  |
| O | -5.47415500 | -0.92971400 | -1.18924300 |

|   |             |             |             |
|---|-------------|-------------|-------------|
| H | -5.28799100 | -0.41341100 | -1.98367300 |
| K | -1.88189100 | 0.84183200  | 2.60453800  |
| K | 5.86814900  | -0.02753400 | 0.74807900  |

|   |             |             |             |
|---|-------------|-------------|-------------|
| H | 4.44438000  | 2.77809700  | -0.02610800 |
| O | 4.96183600  | 2.81413100  | -1.99035700 |
| H | 5.46423400  | 2.27968700  | -2.61817900 |
| K | 0.32812800  | -1.87935800 | -1.93810700 |
| K | -4.19066700 | -2.00963600 | 0.74128300  |

**Products-b complex:**

|   |             |             |             |
|---|-------------|-------------|-------------|
| O | -1.98739100 | -1.64557100 | -0.65473000 |
| H | -1.50275100 | -0.18501100 | 0.59660600  |
| C | -2.64383000 | -1.26960800 | -1.72320900 |
| O | -3.92365800 | -1.09580200 | -1.65105100 |
| O | -2.00765200 | -1.08494700 | -2.83008600 |
| C | -2.48977000 | 4.47474900  | 0.54348100  |
| H | -2.78626500 | 5.49780100  | 0.34367800  |
| C | -2.27968200 | 4.03793600  | 1.85341500  |
| H | -2.41408200 | 4.72505700  | 2.68230800  |
| C | -1.89926000 | 2.72424300  | 2.11466000  |
| H | -1.73950100 | 2.39577700  | 3.13698900  |
| C | -1.71857000 | 1.80752900  | 1.06305200  |
| C | -1.93386900 | 2.25148100  | -0.25448900 |
| H | -1.80478600 | 1.55726900  | -1.07848600 |
| C | -2.31446700 | 3.56747300  | -0.50396000 |
| H | -2.47768400 | 3.88453300  | -1.52865000 |
| N | -1.28492400 | 0.50805700  | 1.31552900  |
| H | -1.46848200 | 0.17569800  | 2.25356600  |
| C | 3.09773000  | -0.84911900 | 0.43883600  |
| O | 3.15186000  | -1.31719800 | 1.67783200  |
| O | 2.45973500  | -1.32605900 | -0.47328900 |
| C | 2.36659900  | -2.52118200 | 1.96391300  |
| H | 1.31883500  | -2.29406600 | 1.76332300  |
| H | 2.70226100  | -3.31004100 | 1.28981600  |
| C | 2.60116900  | -2.87595500 | 3.41268400  |
| H | 2.27427200  | -2.07056300 | 4.07448200  |
| H | 3.65642300  | -3.08595300 | 3.60201400  |
| H | 2.02492000  | -3.77290300 | 3.65397500  |
| O | 3.86719500  | 0.23362000  | 0.35555000  |
| C | 3.92927500  | 0.89396000  | -0.93830300 |
| H | 4.32265900  | 0.19292300  | -1.67698500 |
| H | 2.92691900  | 1.21262700  | -1.22719900 |
| C | 4.85560600  | 2.08732700  | -0.76346900 |
| H | 5.84036700  | 1.75516200  | -0.42083000 |

**Transition state TS2-a:**

|   |             |             |             |
|---|-------------|-------------|-------------|
| O | 2.89415400  | -0.70002900 | -1.17311800 |
| H | 1.97241800  | -0.97397600 | -0.96114300 |
| C | 3.47033800  | -0.12852600 | -0.06579700 |
| O | 2.78033300  | -0.02837200 | 0.98504600  |
| O | 4.66122900  | 0.25008200  | -0.21121000 |
| C | -4.14737000 | 2.61116000  | 1.30552500  |
| H | -4.91235500 | 3.33465400  | 1.56155700  |
| C | -2.97985900 | 2.50957300  | 2.06845300  |
| H | -2.83163000 | 3.15957700  | 2.92411100  |
| C | -1.99812800 | 1.58196800  | 1.74429300  |
| H | -1.09558300 | 1.51235900  | 2.34309200  |
| C | -2.15234500 | 0.72276200  | 0.63650900  |
| C | -3.32649200 | 0.83177100  | -0.13212100 |
| H | -3.46308600 | 0.20221800  | -1.00110000 |
| C | -4.30553800 | 1.76844500  | 0.20837600  |
| H | -5.19897600 | 1.83542700  | -0.40322800 |
| N | -1.15873900 | -0.23550000 | 0.39553300  |
| H | -0.26884900 | -0.00544800 | 0.82110900  |
| C | -1.01284900 | -0.96783100 | -0.88771100 |
| O | 0.29502300  | -1.66483200 | -0.74624100 |
| O | -1.99996700 | -1.75758800 | -1.16447700 |
| C | 0.27021100  | -2.82001800 | 0.11378600  |
| H | 0.14684100  | -2.50182400 | 1.15616800  |
| H | -0.58182900 | -3.44528700 | -0.16651800 |
| C | 1.55811500  | -3.60795200 | -0.04355900 |
| H | 2.42845100  | -3.02947400 | 0.27345600  |
| H | 1.70258600  | -3.91823300 | -1.08187000 |
| H | 1.50472700  | -4.50743100 | 0.57668900  |
| O | -0.78011600 | -0.06278500 | -1.99618300 |
| C | 0.00089100  | 1.12109600  | -1.78715300 |
| H | -0.62740500 | 1.91607100  | -1.36734800 |
| H | 0.83206600  | 0.94068200  | -1.10337100 |

|   |             |             |             |   |             |             |             |
|---|-------------|-------------|-------------|---|-------------|-------------|-------------|
| C | 0.53403200  | 1.55863900  | -3.14464800 | H | 0.63416400  | 2.44538200  | -0.47764500 |
| H | -0.29083000 | 1.65328300  | -3.85890600 | H | -0.40533400 | 2.95139000  | -1.84189500 |
| H | 1.24140000  | 0.82271400  | -3.52993800 | C | -0.11774700 | 4.46992000  | -0.32873400 |
| O | 1.25303100  | 2.79674000  | -3.04427900 | H | 0.00520800  | 4.53204300  | 0.75681700  |
| H | 0.62291600  | 3.49171400  | -2.81596600 | H | -1.01054400 | 5.02983500  | -0.61105300 |
| K | -3.28176500 | -2.20515400 | 1.00629300  | O | 0.98198900  | 5.09047100  | -1.00122600 |
| K | 4.78885800  | 1.12142900  | 2.28699300  | H | 1.80232100  | 4.71346700  | -0.65875500 |
|   |             |             |             | K | 0.84390300  | -0.50003900 | -2.53635100 |
|   |             |             |             | K | 4.70283700  | -0.91181900 | 1.20008400  |

**Products-a complex:**

|   |             |             |             |
|---|-------------|-------------|-------------|
| O | 2.81455600  | -0.83962700 | -0.80508900 |
| H | 2.30797300  | -0.00625600 | 0.61097900  |
| C | 2.80695400  | -2.15044200 | -0.89693000 |
| O | 3.51745800  | -2.84464000 | -0.07397300 |
| O | 2.09043200  | -2.71021500 | -1.80875700 |
| C | -5.18269500 | -2.64893900 | 0.42319700  |
| H | -5.78873300 | -3.54638900 | 0.46296700  |
| C | -5.50803500 | -1.54070400 | 1.20721500  |
| H | -6.37057800 | -1.56899000 | 1.86335800  |
| C | -4.72988600 | -0.39003600 | 1.15522000  |
| H | -4.98455000 | 0.47017400  | 1.76562100  |
| C | -3.60938500 | -0.32915800 | 0.31368900  |
| C | -3.27797100 | -1.43770600 | -0.47382000 |
| H | -2.41927300 | -1.40802400 | -1.12590400 |
| C | -4.06868900 | -2.58563400 | -0.41089400 |
| H | -3.80192500 | -3.43814300 | -1.02549400 |
| N | -2.87984800 | 0.87986200  | 0.32663400  |
| H | -3.23398400 | 1.59942800  | 0.94483900  |
| C | -1.77682100 | 1.22326100  | -0.38405900 |
| O | 2.30969100  | 0.45613200  | 1.48585400  |
| O | -1.18329000 | 0.52412700  | -1.19542300 |
| C | 1.13751400  | 0.07344100  | 2.22685400  |
| H | 0.24339200  | 0.47378700  | 1.73354100  |
| H | 1.04942900  | -1.01922500 | 2.24057800  |
| C | 1.24086100  | 0.61194100  | 3.64014200  |
| H | 1.32473100  | 1.70266800  | 3.63722000  |
| H | 2.11338000  | 0.19856800  | 4.15465100  |
| H | 0.34846400  | 0.34056600  | 4.21116000  |
| O | -1.40844400 | 2.48761300  | -0.07475700 |
| C | -0.25116700 | 3.01823700  | -0.76377400 |
